# Supplementary material
Source: publisher figshare collection journal article supplement (https://gsajournals.figshare.com/ndownloader/files/23204525)
Supplement: Supplementary file 1 [file 23204525]

## Sheet: Table S10
Table S10. Number of SNP jointly associated (GWAS with FDR<10%) to phenotypic trait pairs.
Traits are those described in Supplementary File S1
Only traits significantly associtated (GWASa with qvalueb<10%) to at least one SNP marker are included
Trait (as described in File S1)	AHD_avg	AHD_me16	AHD_me17	AHD_lu17	AHD_po16	AMH_po17	CH300h_lu17	CH300h_po16	CH300h_po17	CHs300_lu17	CHs300_po16	CHs300_po17	CH400h_lu17	CH400h_po16	CH400h_po17	CHs500_me16	CHs500_me17	CHs500_lu16	CHs500_po17	DIS_me17	DIS_lu16	DRO_avg	DST_avg	DST_lu17	GRH_avg	HEA_avg	HEA_lu16	HEA_lu17	HEA_po16	HEA_po17	resCHs300_lu17	resCHs300_po17	HFY_avg	HFY_lu15	HFY_po15	HST_lu17	LMW_avg	LMW_me16	LMW_lu17	PRT_04_me17	SCD_wi1718_lu	SCD_wi1516_po	SGR_lu16	SMH_lu16	VAC_avg	VAC_lu16	VAC_lu17	VAC_po17	VAS_avg
AHD_avg	4	0	0	1	1	0	0	0	0	0	0	0	0	0	0	0	0	0	0	0	0	0	0	0	0	0	0	0	0	0	0	0	2	0	2	0	0	0	0	0	0	0	0	0	0	0	0	0	0
AHD_me16	0	52	0	9	0	0	0	0	0	0	0	0	0	0	0	0	0	0	0	0	0	0	0	0	0	0	0	0	0	0	0	0	0	0	0	0	0	0	0	0	0	0	0	0	0	0	0	0	0
AHD_me17	0	0	2	0	0	0	0	0	0	0	0	0	0	0	0	0	0	0	0	0	0	0	0	0	0	0	0	0	0	0	0	0	0	0	0	0	0	0	0	0	0	0	0	0	0	0	0	0	0
AHD_lu17	1	9	0	17	0	0	0	0	0	0	0	0	0	0	0	0	0	0	0	0	0	0	0	0	0	0	0	0	0	0	0	0	0	1	0	0	0	0	0	0	0	0	0	0	0	0	0	0	0
AHD_po16	1	0	0	0	1	0	0	0	0	0	0	0	0	0	0	0	0	0	0	0	0	0	0	0	0	0	0	0	0	0	0	0	1	0	1	0	0	0	0	0	0	0	0	0	0	0	0	0	0
AMH_po17	0	0	0	0	0	7	0	0	0	0	0	0	0	0	0	0	0	0	0	0	0	0	0	0	0	0	0	0	0	0	0	0	0	0	0	0	0	0	0	0	0	0	0	0	0	0	0	0	0
CH300h_lu17	0	0	0	0	0	0	12	6	2	1	6	0	10	7	6	1	6	6	0	0	0	0	6	6	0	7	7	7	7	7	1	0	0	0	0	6	6	6	6	6	0	0	0	0	0	0	0	0	0
CH300h_po16	0	0	0	0	0	0	6	34	5	0	5	0	12	33	20	1	7	8	0	2	0	0	7	10	0	21	19	14	27	24	0	0	0	0	0	13	11	11	5	8	0	0	0	0	0	0	0	0	0
CH300h_po17	0	0	0	0	0	0	2	5	5	0	2	0	5	5	5	0	4	5	0	0	0	0	4	5	0	5	5	5	5	5	0	0	0	0	0	5	5	5	2	5	0	0	0	0	0	0	0	0	0
CHs300_lu17	0	0	0	0	0	0	1	0	0	4	0	0	1	0	0	0	0	0	0	0	0	0	0	0	0	0	0	0	0	0	4	0	0	0	0	0	0	0	0	0	0	0	0	0	0	0	0	0	0
CHs300_po16	0	0	0	0	0	0	6	5	2	0	11	0	10	9	9	2	10	10	3	0	0	0	10	10	0	10	10	10	10	10	0	0	0	0	0	10	10	10	10	10	0	0	0	0	0	0	0	0	0
CHs300_po17	0	0	0	0	0	0	0	0	0	0	0	2	0	0	0	0	0	0	2	0	0	0	0	0	0	0	0	0	0	0	0	2	0	0	0	0	0	0	0	0	0	0	0	0	0	0	0	0	0
CH400h_lu17	0	0	0	0	0	0	10	12	5	1	10	0	28	20	17	2	12	13	3	0	0	0	12	13	0	22	23	20	22	20	1	0	0	0	0	16	18	19	10	13	0	0	0	0	0	0	0	0	0
CH400h_po16	0	0	0	0	0	0	7	33	5	0	9	0	20	59	33	2	11	13	2	2	0	0	12	16	0	40	37	31	41	42	0	0	0	0	0	22	21	19	9	12	0	0	0	0	0	0	0	0	0
CH400h_po17	0	0	0	0	0	0	6	20	5	0	9	0	17	33	34	2	11	12	2	0	0	0	12	15	0	25	21	22	28	32	0	0	0	0	0	19	18	18	9	12	0	0	0	0	0	0	0	0	0
CHs500_me16	0	0	0	0	0	0	1	1	0	0	2	0	2	2	2	2	2	2	0	0	0	0	2	2	0	2	2	2	2	2	0	0	0	0	0	2	2	2	2	2	0	0	0	0	0	0	0	0	0
CHs500_me17	0	0	0	0	0	0	6	7	4	0	10	0	12	11	11	2	21	16	3	0	0	0	11	12	0	14	15	12	12	13	0	0	0	0	0	12	15	12	10	12	0	0	0	0	0	0	0	0	0
CHs500_lu16	0	0	0	0	0	0	6	8	5	0	10	0	13	13	12	2	16	40	3	0	0	0	12	13	0	17	19	15	15	16	0	0	0	0	0	14	18	15	10	13	0	0	0	0	0	0	0	0	0
CHs500_po17	0	0	0	0	0	0	0	0	0	0	3	2	3	2	2	0	3	3	5	0	0	0	3	3	0	3	3	3	3	3	0	2	0	0	0	3	3	3	3	3	0	0	0	0	0	0	0	0	0
DIS_me17	0	0	0	0	0	0	0	2	0	0	0	0	0	2	0	0	0	0	0	2	0	0	0	0	0	2	2	0	2	2	0	0	0	0	0	0	0	0	0	0	0	0	0	0	0	0	0	0	0
DIS_lu16	0	0	0	0	0	0	0	0	0	0	0	0	0	0	0	0	0	0	0	0	4	0	0	0	0	0	0	0	0	0	0	0	0	0	0	0	0	0	0	0	0	0	0	0	0	0	0	0	0
DRO_avg	0	0	0	0	0	0	0	0	0	0	0	0	0	0	0	0	0	0	0	0	0	2	0	0	2	0	0	0	0	0	0	0	0	0	0	0	0	0	0	0	0	0	0	0	0	0	0	0	0
DST_avg	0	0	0	0	0	0	6	7	4	0	10	0	12	12	12	2	11	12	3	0	0	0	17	14	0	13	13	13	13	13	0	0	0	0	0	13	12	12	10	12	0	0	0	0	0	0	0	0	0
DST_lu17	0	0	0	0	0	0	6	10	5	0	10	0	13	16	15	2	12	13	3	0	0	0	14	22	1	17	17	17	17	17	0	0	0	0	0	16	13	13	10	13	0	0	0	0	0	0	0	0	0
GRH_avg	0	0	0	0	0	0	0	0	0	0	0	0	0	0	0	0	0	0	0	0	0	2	0	1	3	0	0	0	0	0	0	0	0	0	0	0	0	0	0	0	0	0	0	0	0	0	0	0	0
HEA_avg	0	0	0	0	0	0	7	21	5	0	10	0	22	40	25	2	14	17	3	2	0	0	13	17	0	65	49	49	44	54	0	0	0	0	0	30	27	23	10	13	0	0	0	0	0	0	0	0	0
HEA_lu16	0	0	0	0	0	0	7	19	5	0	10	0	23	37	21	2	15	19	3	2	0	0	13	17	0	49	59	40	40	40	0	0	0	0	0	26	27	23	10	13	0	0	0	0	0	0	0	0	0
HEA_lu17	0	0	0	0	0	0	7	14	5	0	10	0	20	31	22	2	12	15	3	0	0	0	13	17	0	49	40	49	36	43	0	0	0	0	0	27	24	22	10	13	0	0	0	0	0	0	0	0	0
HEA_po16	0	0	0	0	0	0	7	27	5	0	10	0	22	41	28	2	12	15	3	2	0	0	13	17	0	44	40	36	51	45	0	0	0	0	0	25	22	21	10	13	0	0	0	0	0	0	0	0	0
HEA_po17	0	0	0	0	0	0	7	24	5	0	10	0	20	42	32	2	13	16	3	2	0	0	13	17	0	54	40	43	45	69	0	0	0	0	0	29	25	22	10	13	0	0	0	0	0	0	0	0	0
resCHs300_lu17	0	0	0	0	0	0	1	0	0	4	0	0	1	0	0	0	0	0	0	0	0	0	0	0	0	0	0	0	0	0	4	0	0	0	0	0	0	0	0	0	0	0	0	0	0	0	0	0	0
resCHs300_po17	0	0	0	0	0	0	0	0	0	0	0	2	0	0	0	0	0	0	2	0	0	0	0	0	0	0	0	0	0	0	0	2	0	0	0	0	0	0	0	0	0	0	0	0	0	0	0	0	0
HFY_avg	2	0	0	0	1	0	0	0	0	0	0	0	0	0	0	0	0	0	0	0	0	0	0	0	0	0	0	0	0	0	0	0	20	7	16	0	1	1	0	0	0	0	0	0	0	0	0	0	0
HFY_lu15	0	0	0	1	0	0	0	0	0	0	0	0	0	0	0	0	0	0	0	0	0	0	0	0	0	0	0	0	0	0	0	0	7	30	4	0	0	0	0	0	0	0	0	0	0	0	0	0	0
HFY_po15	2	0	0	0	1	0	0	0	0	0	0	0	0	0	0	0	0	0	0	0	0	0	0	0	0	0	0	0	0	0	0	0	16	4	16	0	1	1	0	0	0	0	0	0	0	0	0	0	0
HST_lu17	0	0	0	0	0	0	6	13	5	0	10	0	16	22	19	2	12	14	3	0	0	0	13	16	0	30	26	27	25	29	0	0	0	0	0	35	20	19	10	13	0	0	0	0	0	0	0	0	0
LMW_avg	0	0	0	0	0	0	6	11	5	0	10	0	18	21	18	2	15	18	3	0	0	0	12	13	0	27	27	24	22	25	0	0	1	0	1	20	51	39	12	16	0	0	0	0	0	0	0	0	0
LMW_me16	0	0	0	0	0	0	6	11	5	0	10	0	19	19	18	2	12	15	3	0	0	0	12	13	0	23	23	22	21	22	0	0	1	0	1	19	39	55	10	16	0	0	0	0	0	0	0	0	0
LMW_lu17	0	0	0	0	0	0	6	5	2	0	10	0	10	9	9	2	10	10	3	0	0	0	10	10	0	10	10	10	10	10	0	0	0	0	0	10	12	10	12	10	0	0	0	0	0	0	0	0	0
PRT_04_me17	0	0	0	0	0	0	6	8	5	0	10	0	13	12	12	2	12	13	3	0	0	0	12	13	0	13	13	13	13	13	0	0	0	0	0	13	16	16	10	18	0	0	0	0	0	0	0	0	0
SCD_wi1718_lu	0	0	0	0	0	0	0	0	0	0	0	0	0	0	0	0	0	0	0	0	0	0	0	0	0	0	0	0	0	0	0	0	0	0	0	0	0	0	0	0	5	0	0	0	0	0	0	0	0
SCD_wi1516_po	0	0	0	0	0	0	0	0	0	0	0	0	0	0	0	0	0	0	0	0	0	0	0	0	0	0	0	0	0	0	0	0	0	0	0	0	0	0	0	0	0	2	0	0	0	0	0	0	0
SGR_lu16	0	0	0	0	0	0	0	0	0	0	0	0	0	0	0	0	0	0	0	0	0	0	0	0	0	0	0	0	0	0	0	0	0	0	0	0	0	0	0	0	0	0	7	0	0	0	0	0	0
SMH_lu16	0	0	0	0	0	0	0	0	0	0	0	0	0	0	0	0	0	0	0	0	0	0	0	0	0	0	0	0	0	0	0	0	0	0	0	0	0	0	0	0	0	0	0	1	0	0	0	0	0
VAC_avg	0	0	0	0	0	0	0	0	0	0	0	0	0	0	0	0	0	0	0	0	0	0	0	0	0	0	0	0	0	0	0	0	0	0	0	0	0	0	0	0	0	0	0	0	1	0	1	1	0
VAC_lu16	0	0	0	0	0	0	0	0	0	0	0	0	0	0	0	0	0	0	0	0	0	0	0	0	0	0	0	0	0	0	0	0	0	0	0	0	0	0	0	0	0	0	0	0	0	1	0	0	0
VAC_lu17	0	0	0	0	0	0	0	0	0	0	0	0	0	0	0	0	0	0	0	0	0	0	0	0	0	0	0	0	0	0	0	0	0	0	0	0	0	0	0	0	0	0	0	0	1	0	2	1	0
VAC_po17	0	0	0	0	0	0	0	0	0	0	0	0	0	0	0	0	0	0	0	0	0	0	0	0	0	0	0	0	0	0	0	0	0	0	0	0	0	0	0	0	0	0	0	0	1	0	1	2	0
VAS_avg	0	0	0	0	0	0	0	0	0	0	0	0	0	0	0	0	0	0	0	0	0	0	0	0	0	0	0	0	0	0	0	0	0	0	0	0	0	0	0	0	0	0	0	0	0	0	0	0	1
a GWAS: Genome-wide association study, the GWAS model is described in the material and methods
b qvalue: p-value adjustement as described by in Benjamini and Hochberg (1995)
